# Supplementary material for: Interfacial water molecules at biological membranes: Structural features and role for lateral proton diffusion
Source: PubMed Central journal article supplement (PMC5825111; doi:10.1371/journal.pone.0193454), 2018-02-23
Supplement: pone.0193454.s001.pdf [file pone.0193454.s001.pdf]

## Supporting Information

### Interfacial water molecules at biological membranes: structural features and role for lateral proton diffusion

Trung Hai Nguyen<sup>1,#a</sup>, Chao Zhang<sup>1\*,#b</sup>, Ewald Weichselbaum<sup>2</sup>, Denis G. Knyazev<sup>2</sup>,  
Peter Pohl<sup>2</sup>, Paolo Carloni<sup>1\*</sup>

<sup>1</sup> Computational Biomedicine (IAS-5 / INM-9) Forschungszentrum Jülich, 52425  
Jülich, Germany, RWTH Aachen University, 52056, Aachen, Germany

<sup>2</sup> Institute of Biophysics, Johannes Kepler University Linz, 4040, Linz, Austria

<sup>#a</sup> Current Address: Department of Chemistry, Illinois Institute of Technology,  
Chicago, IL 60616, USA

<sup>#b</sup> Current Address: Department of Chemistry, Ångström Laboratory,  
Lägerhyddsvägen 1, BOX 538, 75121 Uppsala, Sweden

\* Corresponding author

E-mail: chao.zhang@kemi.uu.se (CZ), p.carloni@fz-juelich.de (PC)

## MD simulations of systems containing 72 lipids

The simulation boxes contained 72 lipid molecules and 4209 and 4203 water molecules for DOPC and DPhPC respectively. The initial box edges were 51 Å x 51 Å x 70 Å for DOPC system and 53 Å x 53 Å x 70 Å for DPhPC system. The systems underwent 5 ns long NPT equilibration and subsequently 20 ns long NVT production runs using the protocol described in the main text.

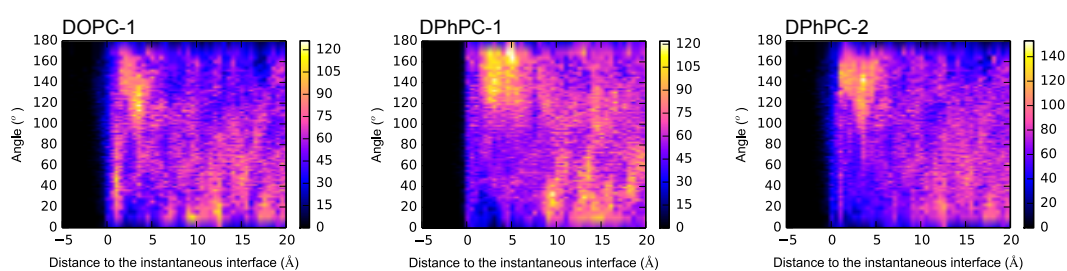

**Fig A1.** 2D histograms of the angle between water dipole moment and interface normal, and the distance from the instantaneous water/membrane interface for DOPC-1, DPhPC-1 and DPhPC-2 system.

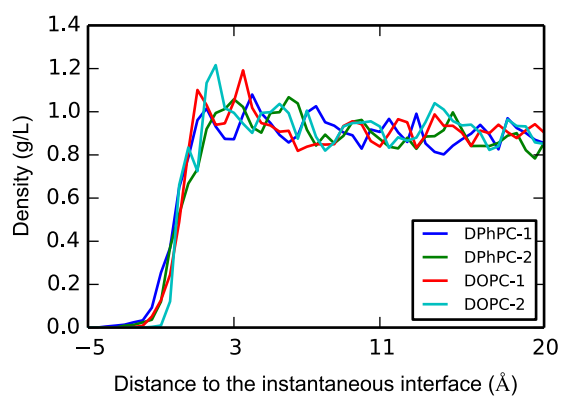

**Fig A2.** Water density as a function of distance from the instantaneous interface.

**Table A1. AMBER force field parameters for DPhPC.**

| Atom names    | GAFF Atom types | REST charges |
|---------------|-----------------|--------------|
| C24           | c3              | -0.304792    |
| H43, H44, H45 | hc              | 0.061803     |
| C23           | c3              | 0.385375     |
| C28           | c3              | -0.304792    |
| H55, H56, H57 | hc              | 0.061803     |
| H42           | hc              | -0.064478    |
| C22           | c3              | -0.178588    |
| H40, H41      | hc              | 0.032934     |
| C21           | c3              | 0.057404     |
| H38, H39      | hc              | -0.008206    |
| C20           | c3              | -0.078449    |
| H36, H37      | hc              | 0.009786     |
| C19           | c3              | 0.246699     |
| C27           | c3              | -0.265526    |
| H52, H53, H54 | hc              | 0.055100     |
| H35           | hc              | -0.038141    |
| C18           | c3              | -0.187307    |
| H33, H34      | c3              | 0.024728     |
| C17           | c3              | 0.203433     |
| H31, H32      | hc              | -0.031490    |
| C16           | c3              | -0.151684    |
| H29, H30      | hc              | 0.022385     |
| C15           | c3              | 0.239158     |
| C26           | c3              | -0.257038    |
| H49, H50, H51 | hc              | 0.050504     |
| H28           | hc              | -0.041279    |
| C14           | c3              | -0.089245    |
| H26, H27      | hc              | 0.017833     |
| C13           | c3              | 0.019435     |
| H24, H25      | hc              | -0.000535    |
| C12           | c3              | -0.125538    |
| H22, H23      | hc              | 0.017471     |
| C11           | c3              | 0.447449     |
| C25           | c3              | -0.363647    |
| H46, H47, H48 | hc              | 0.074660     |
| H21           | hc              | -0.078203    |
| C10           | c3              | -0.367876    |
| H19, H20      | hc              | 0.077043     |
| C9            | c               | 0.923101     |
| O5            | o               | -0.639492    |
| O6            | os              | -0.484254    |
| C6            | c3              | 0.049027     |
| H15, H16      | h1              | 0.073431     |
| C7            | c3              | 0.319067     |
| C8            | c3              | 0.143494     |
| O4            | os              | -0.532524    |

|               |    |           |
|---------------|----|-----------|
| P1            | p5 | 1.456447  |
| O1            | o  | -0.855013 |
| O2            | os | -0.579664 |
| C1            | c3 | 0.350553  |
| C2            | c3 | -0.015061 |
| N1            | n4 | 0.192988  |
| C3            | c3 | -0.238559 |
| H6, H7, H8    | hx | 0.130876  |
| C4            | c3 | -0.238559 |
| H9, H10, H11  | hx | 0.130876  |
| C5            | c3 | -0.238559 |
| H12, H13, H14 | hx | 0.130876  |
| H4, H5        | hx | 0.073389  |
| H2, H3        | h1 | 0.005753  |
| O3            | o  | -0.855013 |
| H17, H18      | h1 | 0.056468  |
| H1            | h1 | 0.046723  |
| O8            | os | -0.539589 |
| C29           | c  | 0.958201  |
| O7            | o  | -0.663825 |
| C30           | c3 | -0.287227 |
| H58, H59      | hc | 0.049996  |
| C31           | c3 | 0.356739  |
| C45           | c3 | -0.373219 |
| H85, H86, H87 | hc | 0.082002  |
| H60           | hc | -0.037018 |
| C32           | c3 | -0.155705 |
| H61, H62      | hc | 0.031669  |
| C33           | c3 | 0.003572  |
| H63, H64      | hc | -0.005336 |
| C34           | c3 | -0.040275 |
| H65, H66      | hc | 0.001334  |
| C35           | c3 | 0.244224  |
| C46           | c3 | -0.290624 |
| H88, H89, H90 | hc | 0.058846  |
| H67           | hc | -0.045075 |
| C36           | c3 | -0.125198 |
| H68, H69      | hc | 0.012073  |
| C37           | c3 | 0.177683  |
| H70, H71      | hc | -0.023401 |
| C38           | c3 | -0.236317 |
| H72, H73      | hc | 0.047095  |
| C39           | c3 | 0.282269  |
| C47           | c3 | -0.295880 |
| H91, H92, H93 | hc | 0.060597  |
| H74           | hc | -0.045560 |
| C40           | c3 | -0.076044 |
| H75, H76      | hc | 0.007880  |
| C41           | c3 | 0.055186  |
| H77, H78      | hc | -0.012015 |
| C42           | c3 | -0.188069 |
| H79, H80      | hc | 0.037842  |

|               |    |           |
|---------------|----|-----------|
| C43           | c3 | 0.433539  |
| C48           | c3 | -0.340052 |
| H94, H95, H96 | hc | 0.068223  |
| H81           | hc | -0.078181 |
| C44           | c3 | -0.340052 |
| H82, H83, H84 | hc | 0.068223  |

**Table A2. Comparison of area per lipid ( $\text{\AA}^2$ ) between MD simulations and experiment for DOPC (1) and DPhPC (2).**

| Systems | Experiment | MD Simulation |
|---------|------------|---------------|
| DOPC    | 72         | 73            |
| DPhPC   | 80         | 77            |

## References

1. Poger D, Mark AE. On the Validation of Molecular Dynamics Simulations of Saturated and cis-Monounsaturated Phosphatidylcholine Lipid Bilayers: A Comparison with Experiment. *J Chem Theory Comput.* 2009;6(1):325-36.
2. Tristram-Nagle S, Kim DJ, Akhunzada N, Kucerka N, Mathai JC, Katsaras J, et al. Structure and water permeability of fully hydrated diphytanoylPC. *Chem Phys Lipids.* 2010;163(6):630-7.
